# Supplementary material for: Dietary lipid levels have a remarkable impact on the expression of growth-related genes in Senegalese sole (Solea senegalensis Kaup)
Source: Oxford University Press journal article supplement (doi:10.1242/jeb.033126), 2009-12-28
Supplement: jeb033126tables2.pdf [file jeb033126tables2.pdf]

Table S2. Comparison of the partial amino acid sequence of Senegalese sole key growth genes with their orthologues from other fish and vertebrate species

| .     | <i>H. hippoglossus</i> | <i>P. olivaceus</i> | <i>D. labrax</i> | <i>S. salar</i> | <i>S. aurata</i> | <i>O. mykiss</i> | <i>T. rubripes</i> | <i>D. rerio</i> | <i>G. gallus</i> | <i>M. musculus</i> | <i>H. sapiens</i> |
|-------|------------------------|---------------------|------------------|-----------------|------------------|------------------|--------------------|-----------------|------------------|--------------------|-------------------|
| Myf5  | —                      | 87%                 | —                | 75%             | —                | 78%              | 85%                | 76%             | 56%              | 58%                | 57%               |
| Mrf4  | —                      | —                   | —                | 84%             | —                | 85%              | 94%                | 85%             | 77%              | 75%                | 75%               |
| MyoD1 | 93%                    | 93%                 | —                | —               | 90%              | —                | 87%                | 75%             | 67%              | 63%                | 63%               |
| MyoD2 | 78%                    | —                   | —                | 65%             | 79%              | —                | 66%                | —               | —                | —                  | —                 |
| Myog  | 91%                    | 91%                 | —                | 78%             | 90%              | 77%              | 87%                | 68%             | 53%              | 51%                | 52%               |
| Mstn1 | —                      | 88%                 | 89%              | 81%             | 85%              | 81%              | 87%                | 78%             | 63%              | 61%                | 63%               |
| Fst   | —                      | 96%                 | —                | 87%             | 97%              | 86%              | 95%                | 89%             | 78%              | 74%                | 74%               |
| Fgf6  | —                      | —                   | 92%              | —               | —                | 85%              | —                  | 79%             | —                | 66%                | 66%               |
| MyHC  | 94%                    | —                   | 92%              | —               | —                | —                | —                  | 89%             | 82%              | 82%                | 81%               |
| MyLC2 | 95%                    | —                   | —                | 91%             | 92%              | 90%              | —                  | 95%             | 86%              | 85%                | 85%               |
| Igf1R | —                      | 98%                 | —                | —               | —                | —                | —                  | 93%             | —                | 89%                | 89%               |
| IR    | —                      | 97%                 | —                | —               | —                | 92%              | —                  | —               | 91%              | 88%                | 89%               |
